# Supplementary material for: Genetic code expansion in the mouse brain
Source: Springer Nature journal article supplement (doi:10.1038/nchembio.2160), 2016-08-29
Supplement: 41589_2016_BFnchembio2160_MOESM11_ESM.mol [file 41589_2016_BFnchembio2160_MOESM11_ESM.mol]

nchembio.2160-comp6.mol
  ChemDraw08091609552D

 56 59  0  0  0  0  0  0  0  0999 V2000
   -4.6001    0.5649    0.0000 C   0  0  0  0  0  0  0  0  0  0  0  0
   -4.2368   -0.1758    0.0000 C   0  0  0  0  0  0  0  0  0  0  0  0
   -3.4137   -0.2315    0.0000 C   0  0  0  0  0  0  0  0  0  0  0  0
   -2.9539    0.4535    0.0000 C   0  0  0  0  0  0  0  0  0  0  0  0
   -3.3172    1.1942    0.0000 C   0  0  0  0  0  0  0  0  0  0  0  0
   -4.1403    1.2499    0.0000 C   0  0  0  0  0  0  0  0  0  0  0  0
   -2.1372    0.5701    0.0000 N   0  3  0  0  0  0  0  0  0  0  0  0
   -1.9957    1.3829    0.0000 C   0  0  0  0  0  0  0  0  0  0  0  0
   -2.7250    1.7686    0.0000 C   0  0  0  0  0  0  0  0  0  0  0  0
   -3.2344    2.4175    0.0000 C   0  0  0  0  0  0  0  0  0  0  0  0
   -2.4177    2.5342    0.0000 C   0  0  0  0  0  0  0  0  0  0  0  0
    4.3920   -0.4959    0.0000 C   0  0  0  0  0  0  0  0  0  0  0  0
    4.8153    0.2122    0.0000 C   0  0  0  0  0  0  0  0  0  0  0  0
    4.4137    0.9329    0.0000 C   0  0  0  0  0  0  0  0  0  0  0  0
    3.5888    0.9455    0.0000 C   0  0  0  0  0  0  0  0  0  0  0  0
    3.1655    0.2374    0.0000 C   0  0  0  0  0  0  0  0  0  0  0  0
    3.5671   -0.4833    0.0000 C   0  0  0  0  0  0  0  0  0  0  0  0
    3.0462    1.5669    0.0000 N   0  0  0  0  0  0  0  0  0  0  0  0
    2.2875    1.2429    0.0000 C   0  0  0  0  0  0  0  0  0  0  0  0
    2.3612    0.4212    0.0000 C   0  0  0  0  0  0  0  0  0  0  0  0
    2.1356   -0.3724    0.0000 C   0  0  0  0  0  0  0  0  0  0  0  0
    1.5612    0.2198    0.0000 C   0  0  0  0  0  0  0  0  0  0  0  0
   -1.5628   -0.0221    0.0000 C   0  0  0  0  0  0  0  0  0  0  0  0
    3.2718    2.3604    0.0000 C   0  0  0  0  0  0  0  0  0  0  0  0
    4.6463    1.9696    0.0000 C   0  0  0  0  0  0  0  0  0  0  0  0
    4.0719    2.5618    0.0000 C   0  0  0  0  0  0  0  0  0  0  0  0
    0.9605   -1.5972    0.0000 C   0  0  0  0  0  0  0  0  0  0  0  0
    1.1861   -0.8037    0.0000 O   0  0  0  0  0  0  0  0  0  0  0  0
    1.5349   -2.1894    0.0000 N   0  0  0  0  0  0  0  0  0  0  0  0
    2.3350   -1.9881    0.0000 C   0  0  0  0  0  0  0  0  0  0  0  0
    2.9094   -2.5802    0.0000 C   0  0  0  0  0  0  0  0  0  0  0  0
    3.7094   -2.3789    0.0000 C   0  0  0  0  0  0  0  0  0  0  0  0
    0.1605   -1.7986    0.0000 C   0  0  0  0  0  0  0  0  0  0  0  0
   -0.4140   -1.2064    0.0000 C   0  0  0  0  0  0  0  0  0  0  0  0
   -1.2140   -1.4078    0.0000 C   0  0  0  0  0  0  0  0  0  0  0  0
   -1.7884   -0.8156    0.0000 C   0  0  0  0  0  0  0  0  0  0  0  0
   -1.2550    1.7462    0.0000 C   0  0  0  0  0  0  0  0  0  0  0  0
   -0.5701    1.2864    0.0000 C   0  0  0  0  0  0  0  0  0  0  0  0
    0.1506    1.6880    0.0000 C   0  0  0  0  0  0  0  0  0  0  0  0
    0.8587    1.2646    0.0000 C   0  0  0  0  0  0  0  0  0  0  0  0
    1.5794    1.6662    0.0000 C   0  0  0  0  0  0  0  0  0  0  0  0
   -5.4233    0.6206    0.0000 S   0  0  0  0  0  0  0  0  0  0  0  0
   -5.4790   -0.2025    0.0000 O   0  0  0  0  0  0  0  0  0  0  0  0
   -5.3675    1.4437    0.0000 O   0  0  0  0  0  0  0  0  0  0  0  0
   -6.2464    0.6763    0.0000 O   0  5  0  0  0  0  0  0  0  0  0  0
    4.7935   -1.2165    0.0000 S   0  0  0  0  0  0  0  0  0  0  0  0
    5.5142   -0.8150    0.0000 O   0  0  0  0  0  0  0  0  0  0  0  0
    4.0729   -1.6181    0.0000 O   0  0  0  0  0  0  0  0  0  0  0  0
    5.1951   -1.9372    0.0000 O   0  0  0  0  0  0  0  0  0  0  0  0
    5.4463    2.1710    0.0000 S   0  0  0  0  0  0  0  0  0  0  0  0
    5.2450    2.9710    0.0000 O   0  0  0  0  0  0  0  0  0  0  0  0
    5.6477    1.3710    0.0000 O   0  0  0  0  0  0  0  0  0  0  0  0
    6.2464    2.3724    0.0000 O   0  0  0  0  0  0  0  0  0  0  0  0
    4.2838   -2.9710    0.0000 N   0  0  0  0  0  0  0  0  0  0  0  0
    5.0839   -2.7697    0.0000 N   0  3  0  0  0  0  0  0  0  0  0  0
    5.8839   -2.5683    0.0000 N   0  5  0  0  0  0  0  0  0  0  0  0
 42 43  2  0      
 42 44  2  0      
 42 45  1  0      
  1 42  1  0      
 46 47  2  0      
 46 48  2  0      
 46 49  1  0      
 12 46  1  0      
 50 51  2  0      
 50 52  2  0      
 50 53  1  0      
 25 50  1  0      
 55 56  2  0      
 54 55  2  0      
 32 54  1  0      
  1  2  2  0      
  2  3  1  0      
  3  4  2  0      
  4  5  1  0      
  5  6  2  0      
  6  1  1  0      
  4  7  1  0      
  7  8  2  0      
  8  9  1  0      
  9  5  1  0      
  9 10  1  0      
  9 11  1  0      
 12 13  2  0      
 13 14  1  0      
 14 15  2  0      
 15 16  1  0      
 16 17  2  0      
 17 12  1  0      
 15 18  1  0      
 18 19  1  0      
 19 20  1  0      
 20 16  1  0      
 20 21  1  0      
 20 22  1  0      
  7 23  1  0      
 18 24  1  0      
 24 26  1  0      
 26 25  1  0      
 23 36  1  0      
 27 28  2  0      
 27 29  1  0      
 29 30  1  0      
 30 31  1  0      
 31 32  1  0      
 33 27  1  0      
 34 33  1  0      
 35 34  1  0      
 36 35  1  0      
 37 38  2  0      
 38 39  1  0      
 39 40  2  0      
  8 37  1  0      
 40 41  1  0      
 41 19  2  0      
M  CHG  4   7   1  45  -1  55   1  56  -1
M  STY  1   1 SUP
M  SLB  1   1   1
M  SAL   1  4  42  43  44  45
M  SBL   1  1   4
M  SMT   1 ^SO3-
M  SBV   1   4    0.8231   -0.0557
M  STY  1   2 SUP
M  SLB  1   2   2
M  SAL   2  4  46  47  48  49
M  SBL   2  1   8
M  SMT   2 SO3H
M  SBV   2   8   -0.4016    0.7207
M  STY  1   3 SUP
M  SLB  1   3   3
M  SAL   3  4  50  51  52  53
M  SBL   3  1  12
M  SMT   3 SO3H
M  SBV   3  12   -0.8000   -0.2014
M  STY  1   4 SUP
M  SLB  1   4   4
M  SAL   4  3  54  55  56
M  SBL   4  1  15
M  SMT   4 N3
M  SBV   4  15   -0.5744    0.5922
M  END
